# Supplementary material
Source: PubMed Central journal article supplement (PMC1933406)
Supplement: 7601775s1.pdf [file 7601775s1.pdf]

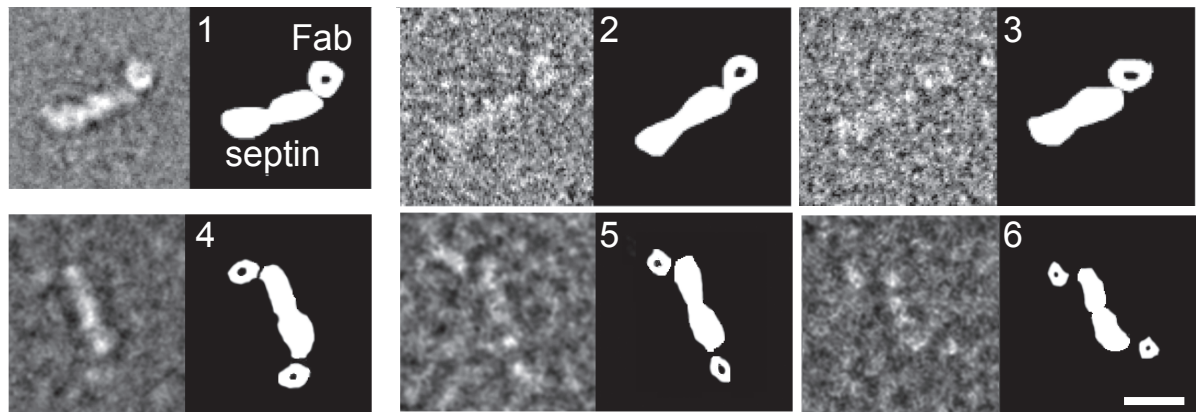

Projection average and representative raw images of negatively stained 6xHis-UNC-59/UNC-61 heterotetramers in complex with  $\alpha$ -His Fab fragments. Panel 1 shows an average of 66 heterotetramers in complex with a single  $\alpha$ -His Fab fragment. Panels 2 and 3 are representative images from this class. Panel 4 shows an average containing 9 heterotetramers in complex with two  $\alpha$ -His Fab fragments, one at each extremity. Panels 5, 6 show representative raw images included in this average. Schematic drawings are shown to the right of each panel. The scale bar represents 10 nm.
